# Supplementary material for: Multi-optical signal channel gold nanoclusters and their application in heavy metal ions sensing arrays
Source: Royal Society of Chemistry journal article supplement (doi:10.1039/d0tc05160h), 2021-01-01
Supplement: d0tc05160h1.pdf [file d0tc05160h1.pdf]

## Supporting Information

# Multi-optical Signal Channels Gold Nanoclusters and Their Application in Heavy Metal Ions Sensing Array

*Yunyun Gui, Yihe Wang, Chiyang He, Zhouqing Tan, Lingfeng Gao<sup>\*a,b,c</sup>, Wei Li<sup>\*a,b</sup>*

- a. College of Chemistry and Chemical Engineering, Wuhan Textile University,  
Wuhan, Hubei, 430200, P. R. China.
- b. Hubei Key Laboratory of Biomass Fibers and Eco-dyeing & Finishing, Wuhan  
Textile University, Wuhan 430200, P. R. China.
- c. University of Science and Technology of China, Hefei, Anhui, 230026, P. R.  
China.

\*Corresponding author: Dr. Lingfeng Gao

Tel: +86-027-59367336

Email: [lfgao@wtu.edu.cn](mailto:lfgao@wtu.edu.cn) .

### S1. The UV-vis spectrum of MS-AuNCs

From UV-vis spectrum of MS-AuNCs (as shown in Fig S1), two absorption peaks could be seen at about 290 nm and 240 nm. The spectrum was matched with the UV-vis spectrum of AuNCs reported in previous work<sup>1</sup>. The result could prove that the average size of the MS-AuNCs was around  $2.0\pm 0.5$  nm.

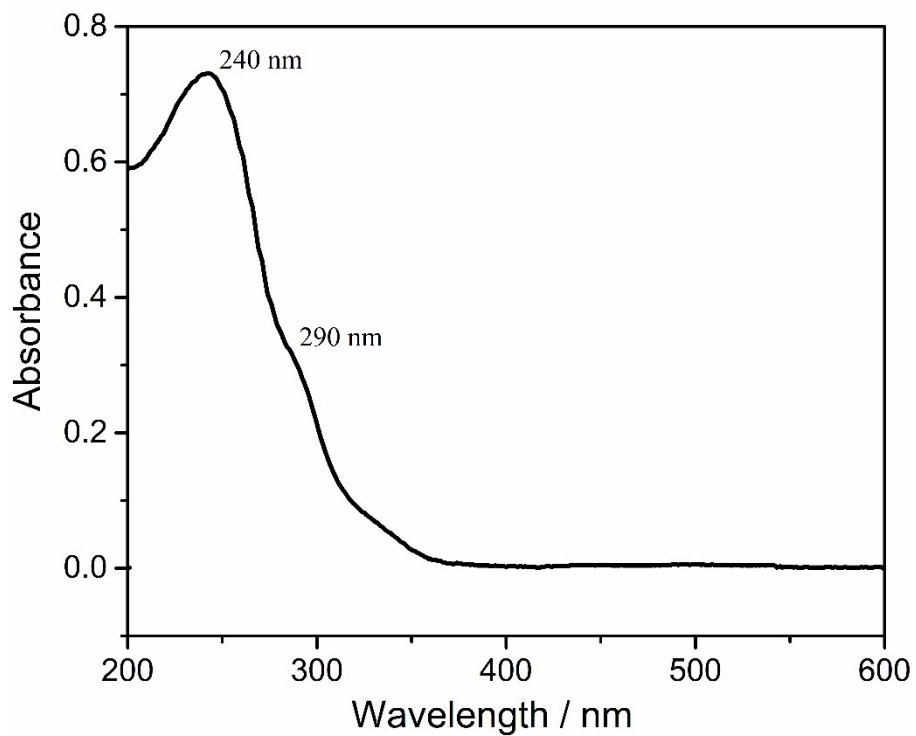

Fig. S1. The UV-vis spectrum of MS-AuNCs.

## S2. Experimental ESR spectra

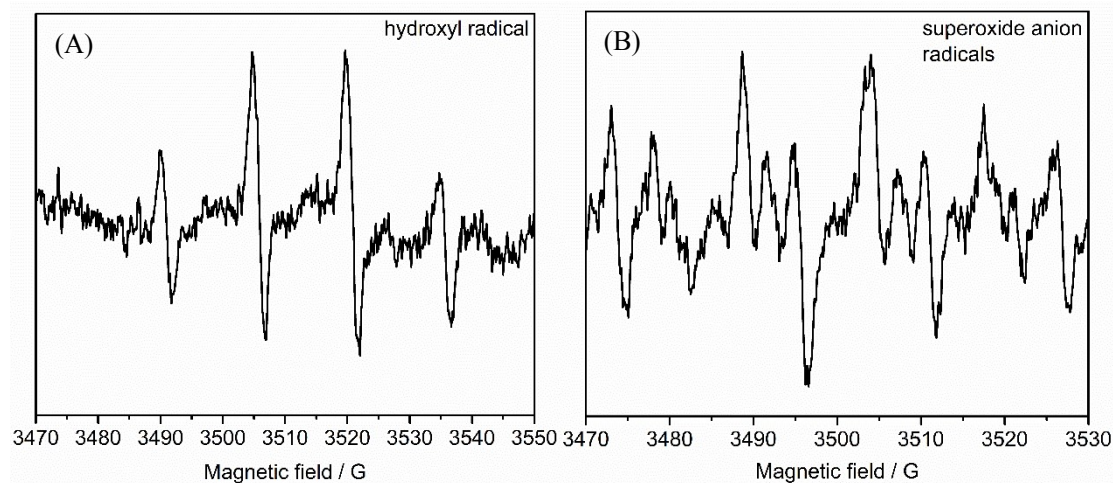

**Fig S2** Experimental ESR spectra of DMPO-OH<sup>•</sup> and DMPO-O<sub>2</sub><sup>•-</sup> in MS-AuNCs-H<sub>2</sub>O<sub>2</sub> CL reaction and could increase CL intensity.

### S3. The detection results at three concentrations

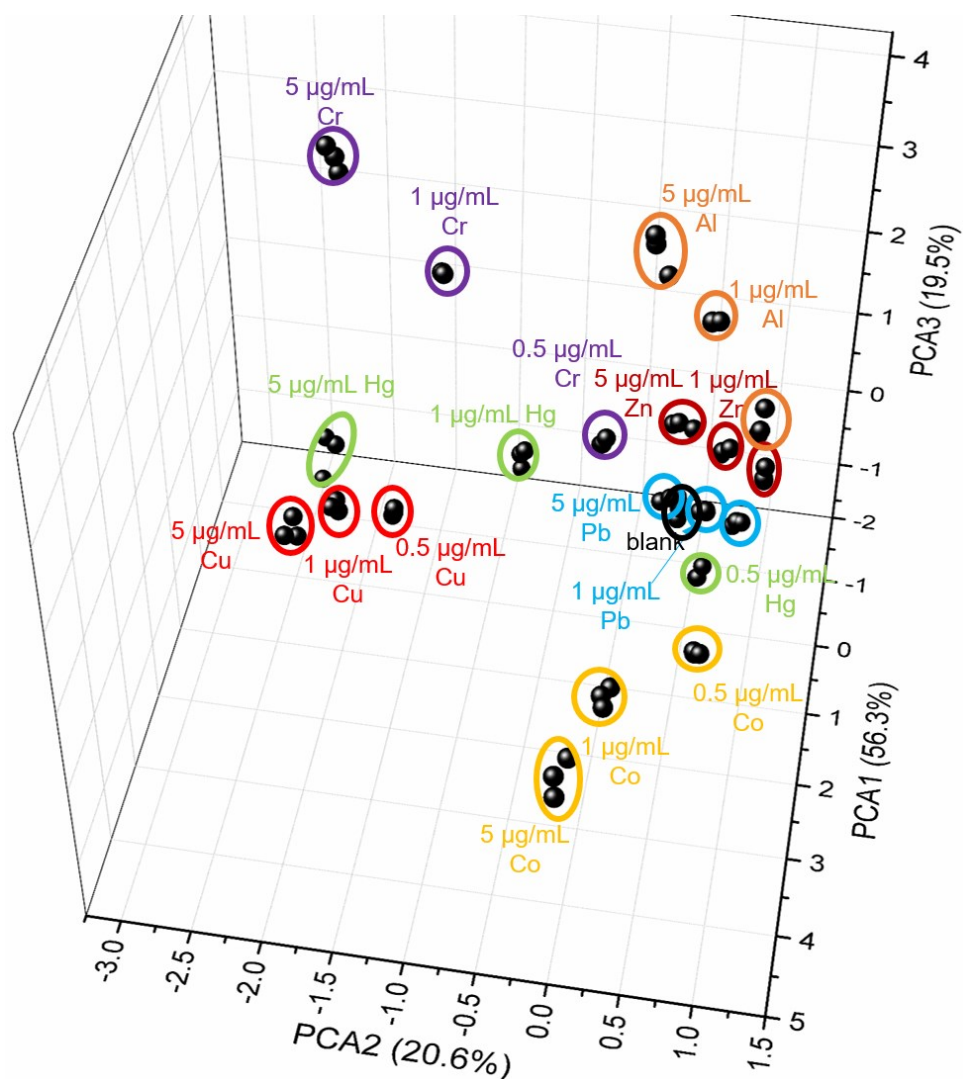

**Fig S3.** PCA plot for discrimination of seven heavy metal ions at three different concentrations (5.0 µg/mL, 1.0 µg/mL and 0.5 µg/mL) based on MS-AuNCs. For CL detection:  $\text{H}_2\text{O}_2=5$  mM;  $\text{NaOH}=0.1$  M; For FL detection, excitation wavelengths=290 nm, emission wavelength=424 nm and 598 nm.

## References:

1. J. Sun, J. Zhang and Y. Jin, *J. Mater. Chem. C*, 2013, **1**, 138-143.
